# Supplementary material for: High stability of robust anti-thermal-quenching lead-free double perovskite crystals for optoelectronic devices and high-performance fibers
Source: Royal Society of Chemistry journal article supplement (doi:10.1039/d4tc03773a), 2024-10-29
Supplement: d4tc03773a1.pdf [file d4tc03773a1.pdf]

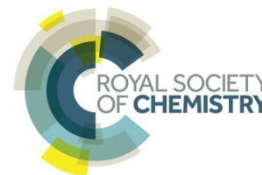

## Supplementary information

### High stability of robust anti-thermal-quenching lead-free double perovskite crystals for optoelectronic devices and high-performance fibers

Xiaoman Zhang <sup>a</sup>, Yehua Zheng <sup>a</sup>, Kun Nie <sup>a, b \*</sup>, Xiaodong Zhang <sup>a</sup>, Xiuqiang Duan <sup>a</sup>, Ziyao Hu <sup>a</sup>, Ming Yang <sup>b</sup>, Lefu Mei <sup>c</sup>, Luoxin Wang <sup>a</sup>, Hua Wang <sup>a</sup>, Mingquan Li, <sup>a</sup> Xiaoxue Ma <sup>a, \*</sup>

<sup>a</sup> Hubei Key Laboratory for New Textile Materials and Applications and State Key Laboratory of New Textile Materials & Advanced Processing Technology, School of Materials Science and Engineering, Wuhan Textile University, Wuhan 430200, P.R. China

<sup>b</sup> Hubei Province Integrative Technology and Innovation Center for Advanced Fibrous Materials, Wuhan 430200, P.R. China

<sup>c</sup> Engineering Research Center of Ministry of Education for Geological Carbon Storage and Low Carbon Utilization of Resources, Beijing Key Laboratory of Materials Utilization of Nonmetallic Minerals and Solid Wastes, National Laboratory of Mineral Materials, School of Materials Science and Technology, China University of Geosciences (Beijing), Beijing 100083, P.R. China

\*Corresponding contributor. E-mail: Kun Nie, [knie@wtu.edu.cn](mailto:knie@wtu.edu.cn); Xiaoxue Ma, [xxma@wtu.edu.cn](mailto:xxma@wtu.edu.cn).

**Table S1.** Chemical composition (at %) of  $\text{Cs}_2\text{NaHo}_{1-x}\text{Cl}_6:x\text{Sb}^{3+}$  measured by EDS.

| x     | Cs    | Na    | Ho    | Cl    | Sb   |
|-------|-------|-------|-------|-------|------|
| 0     | 21.52 | 8.59  | 10.96 | 58.93 | /    |
| 0.008 | 16.18 | 22.10 | 8.85  | 51.81 | 1.06 |

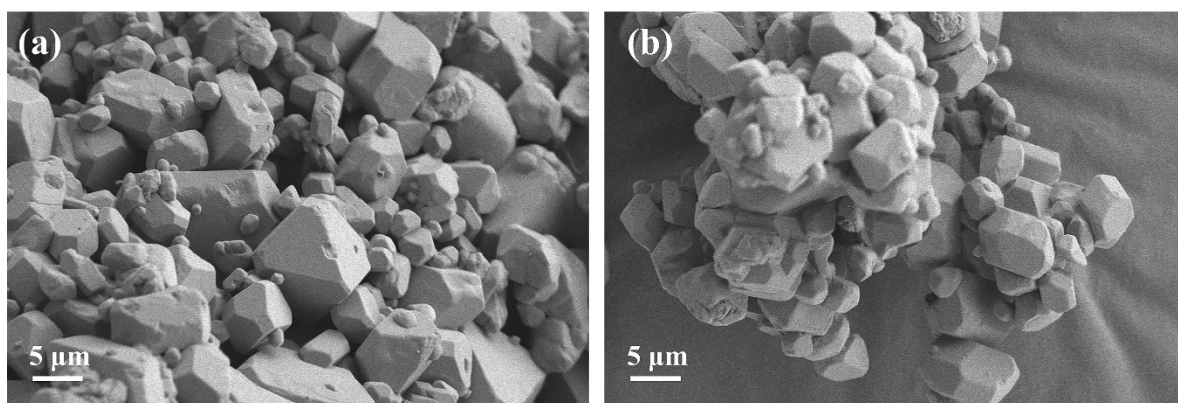

**Figure S1** Scanning electron microscope (SEM) images of Cs<sub>2</sub>NaHoCl<sub>6</sub>:Sb<sup>3+</sup> perovskite crystals (PCs).

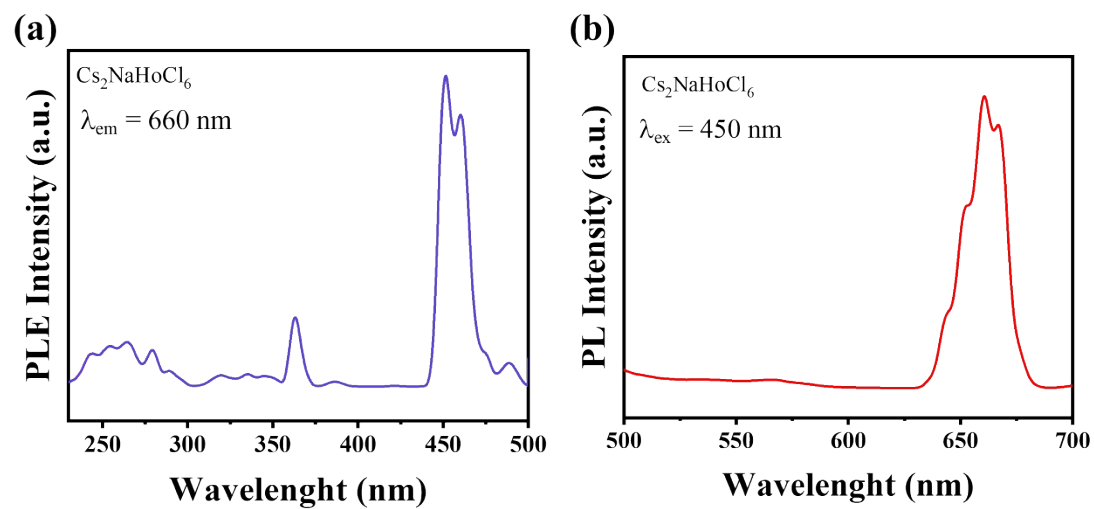

**Figure S2** (a) Photoluminescence excitation (PLE) spectrum of Cs<sub>2</sub>NaHoCl<sub>6</sub> PCs. (b) Photoluminescence (PL) spectrum of Cs<sub>2</sub>NaHoCl<sub>6</sub> PCs.

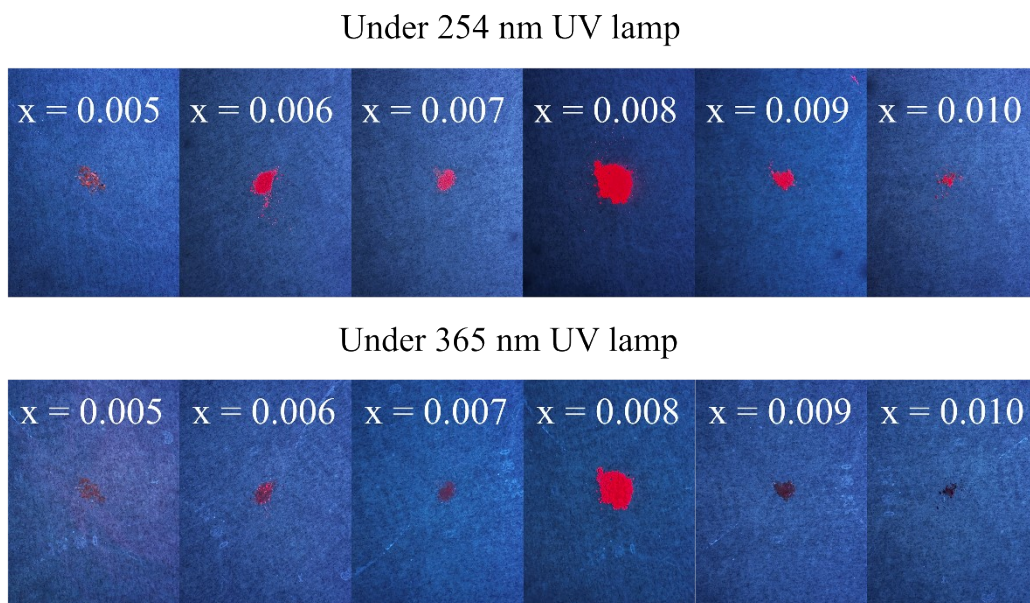

**Figure S3** Fluorescence performance of  $\text{Cs}_2\text{NaHo}_{1-x}\text{Cl}_6:x\text{Sb}^{3+}$  PCs under ultraviolet (UV) lamp (254 nm, 365 nm).

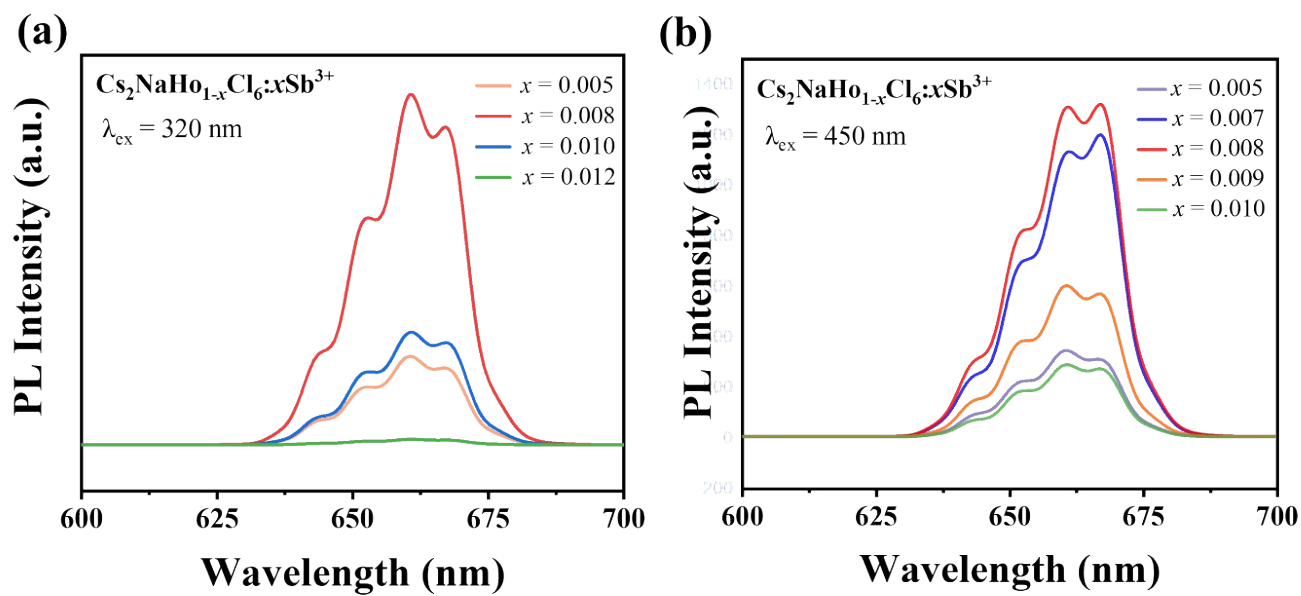

**Figure S4** PL (excited by 320 nm UV-light) spectra of Cs<sub>2</sub>NaHo<sub>1-x</sub>Cl<sub>6</sub>: xSb<sup>3+</sup> PCs. PL (excited by 450 nm blue-light) spectra of Cs<sub>2</sub>NaHo<sub>1-x</sub>Cl<sub>6</sub>: xSb<sup>3+</sup> PCs.

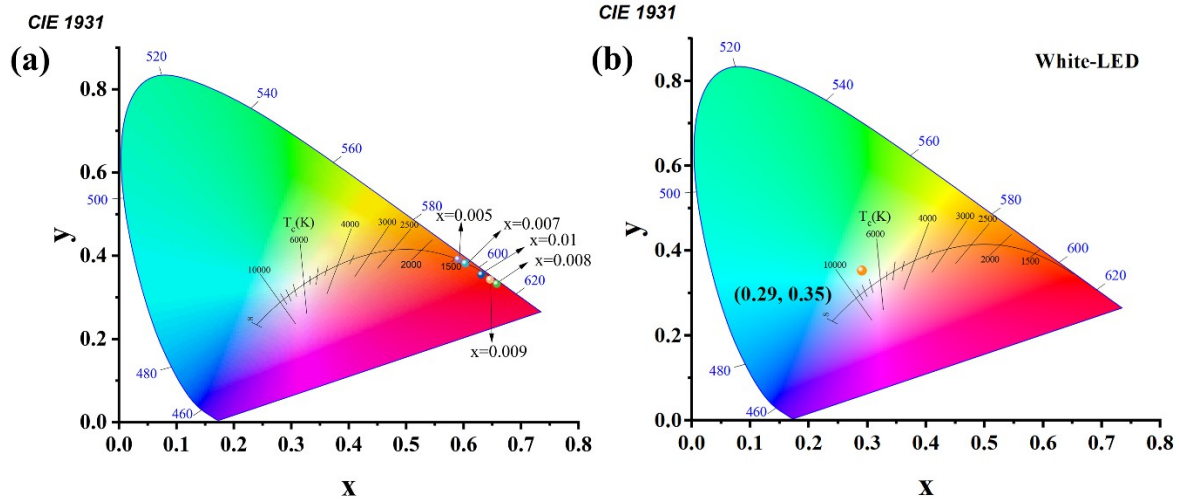

**Figure S5** (a) Commission Internationale de L'Eclairage (CIE) color coordinates of  $\text{Cs}_2\text{NaHo}_{1-x}\text{Cl}_6: x\text{Sb}^{3+}$  PCs. (b) CIE color coordinates of white LED.

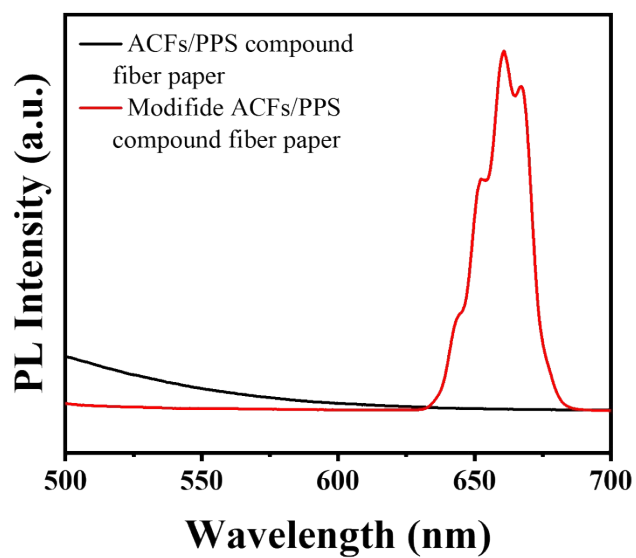

**Figure S6** PL (excited by 250 nm UV light) spectra of aramid chopped fibers (ACFs) and polyphenylene sulfide (PPS) compound fiber without modification and modified.



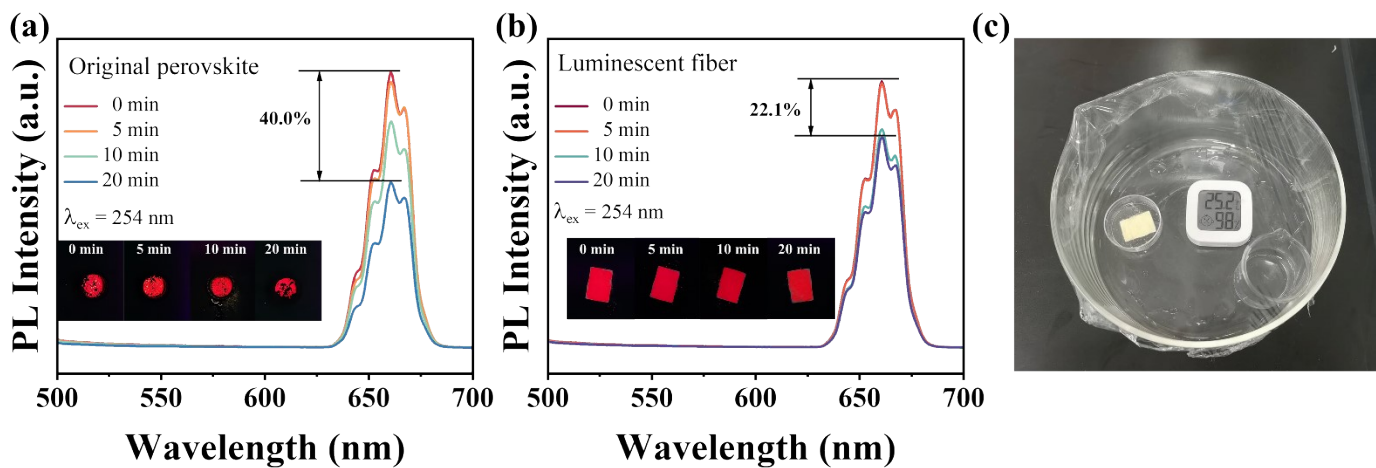

**Figure S7** (a) PL spectra of the original perovskite powder at 98% humidity. (b) PL spectra of luminescent fibers at 98% humidity. (c) Luminescence stability test in humid environments.

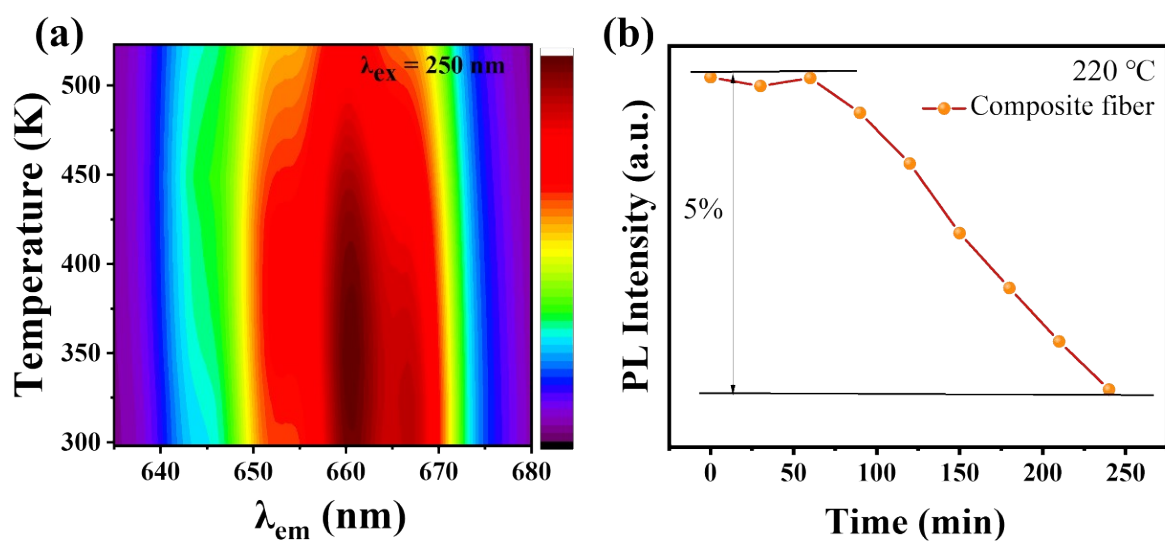

**Figure S8** (a) Temperature-dependent PL spectra of ACFs/PPS flexible luminescent fiber paper. (b) The luminescence intensity of flexible luminescent fiber changes at a sustained 220 °C.
